# Supplementary material for: Single-cell genotypic and phenotypic analysis of measurable residual disease in acute myeloid leukemia
Source: PubMed Central journal article supplement — Sci Adv. 2023 Sep 20;9(38):eadg0488. doi: 10.1126/sciadv.adg0488 (PMC10881057; doi:10.1126/sciadv.adg0488), 2023-09-20
Supplement: sciadv.adg0488_sm.pdf [file sciadv.adg0488_sm.pdf]

Supplementary Materials for  
**Single-cell genotypic and phenotypic analysis of measurable residual disease  
in acute myeloid leukemia**

Troy M. Robinson *et al.*

Corresponding author: Wenbin Xiao, [xiaow@mskcc.org](mailto:xiaow@mskcc.org); Ross L. Levine, [leviner@mskcc.org](mailto:leviner@mskcc.org)

*Sci. Adv.* **9**, eadg0488 (2023)  
DOI: 10.1126/sciadv.adg0488

**The PDF file includes:**

Figs. S1 to S6  
Legends for tables S1 to S6

**Other Supplementary Material for this manuscript includes the following:**

Tables S1 to S6

## Supplementary Figures

### Figure S1

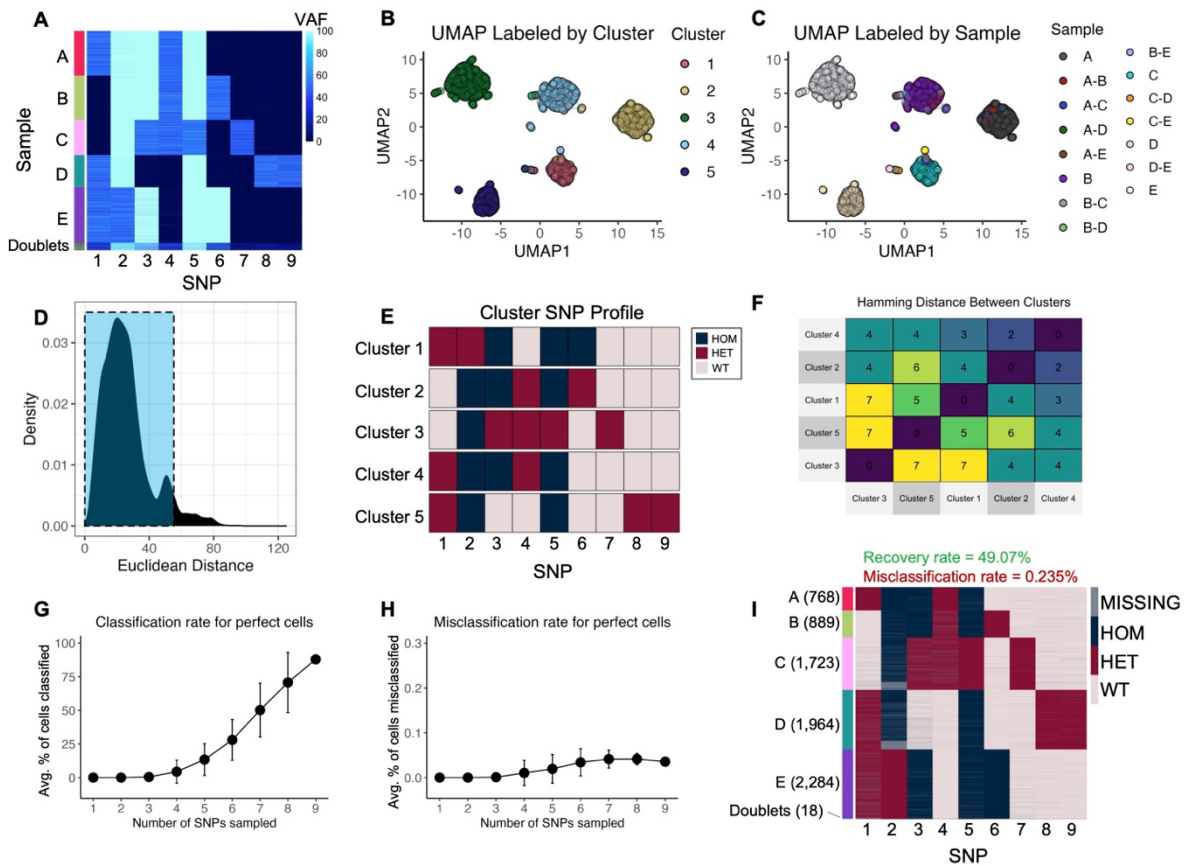

**Supplementary Figure S1.** Synthetic multiplexing of patient AML samples. **A.** Heatmap of SNP allele frequencies in a subset of cells with complete genotyping information for the top 9 SNPs used for demultiplexing. **B.** UMAP plot showing the results of K-means clustering on SNP allele frequencies with  $k=5$ . **C.** UMAP plot labeled by sample, showing the partitioning of most singlets and doublets into clusters in UMAP space. **D.** Distribution of Euclidean distances from cells to their respective cluster centers. **E.** Most common SNP profile for each of the 5 clusters after doublet exclusion. **F.** Heatmap showing Hamming distances between each cluster SNP profile within the synthetic mixing dataset. **G.** Classification rate and misclassification rate (**H**) when 1-9 SNPs are selected at random from cells with complete genotyping. After excluding repeat samples, the following number of sample replicates remained ( $n = 1$  (9),  $n = 2$  (26),  $n = 3$  (39),  $n = 4$  (36),  $n = 5$  (42),  $n = 6$  (37),  $n = 7$  (28),  $n = 8$  (9),  $n = 9$  (1)). **I.** Heatmap showing cells classified for each sample in the synthetic mixing experiment.

Figure S2

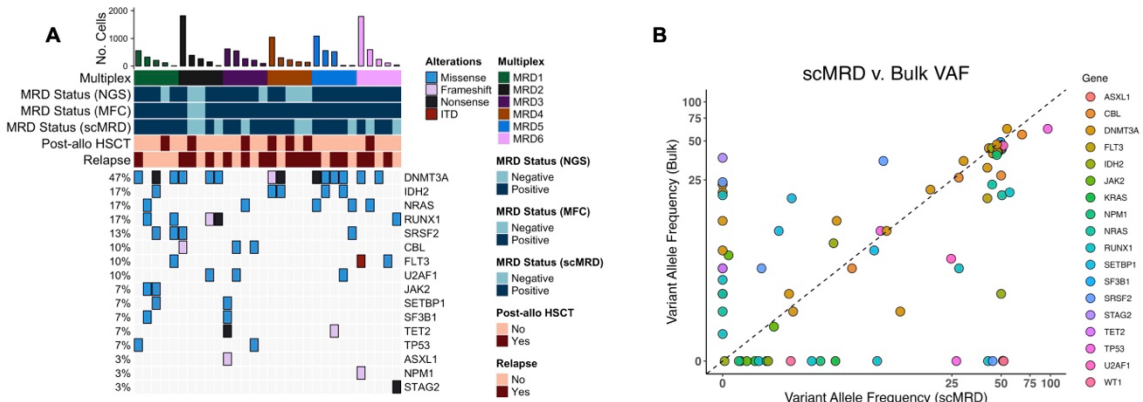

**Supplementary Figure S2.** Cohort overview and comparison of variant allele frequency (VAF) between sequencing methods. **A.** Oncoprint showing concordance of MRD detection by bulk NGS assay (sensitivity 2%), scMRD, and MFC (sensitivity 0.1%). Bar plot (top) represents the number of cells recovered after computational demultiplexing. Mutations represent those that were detected by bulk NGS at the remission timepoint and are covered by the custom scDNA panel. Post allo-HSCT represents the time of MRD assessment. Relapse represents patient outcomes after MRD assessment. **B.** Scatter plot showing mutation VAF as detected by scMRD (x-axis) or bulk NGS (y axis).

# Figure S3

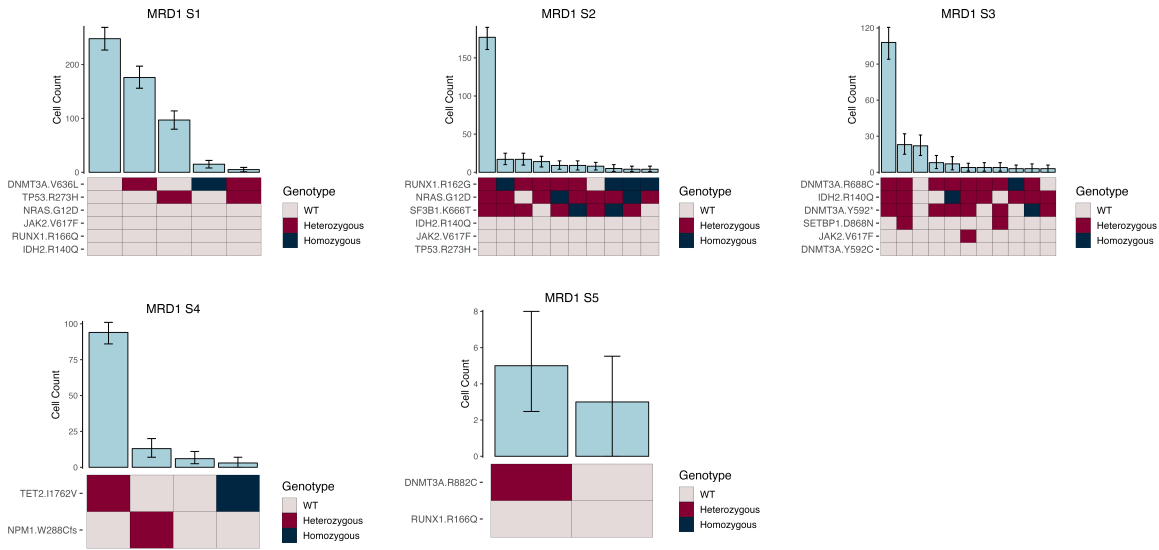



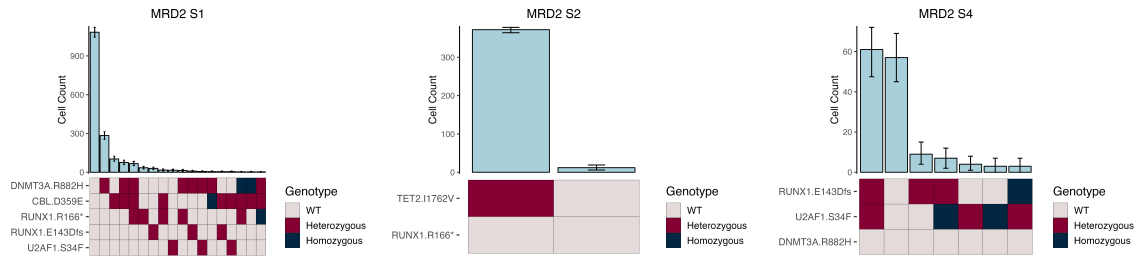

MRD2 S3 and S5 are MRD- by scMRD: can't determine clonality

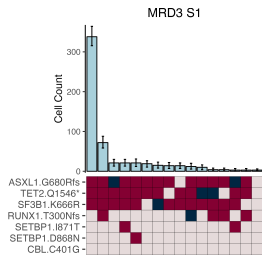

Genotype  
 WT  
 Heterozygous  
 Homozygous

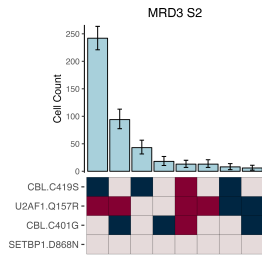

Genotype  
 WT  
 Heterozygous  
 Homozygous

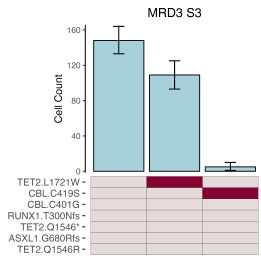

Genotype  
 WT  
 Heterozygous  
 Homozygous

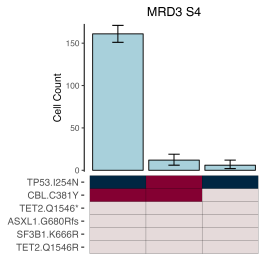

Genotype  
 WT  
 Heterozygous  
 Homozygous

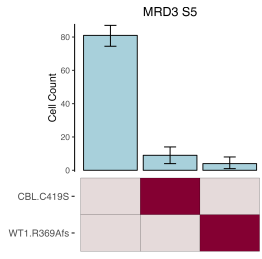

Genotype  
 WT  
 Heterozygous  
 Homozygous

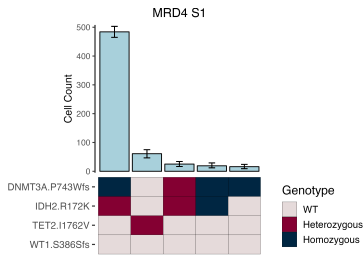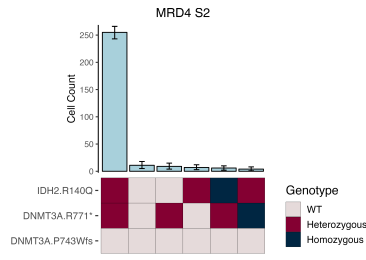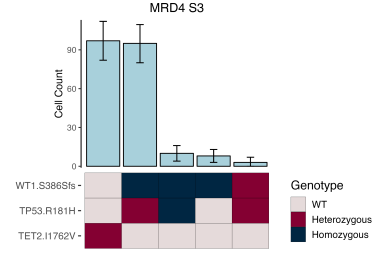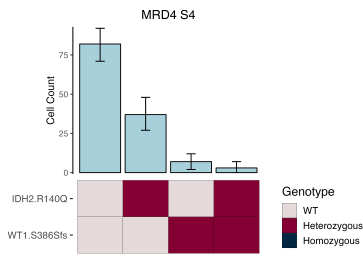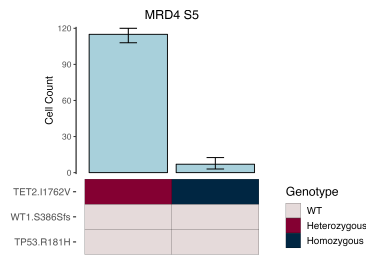



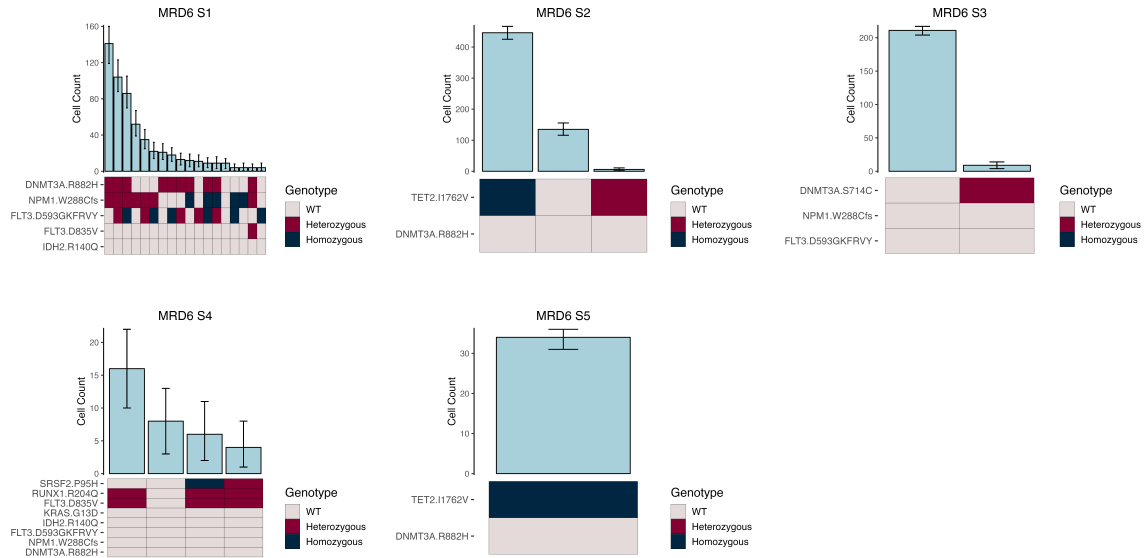

**Supplementary Figure S3.** Clonal bar plots for all samples included in the study, except for MRD2-S3 and MRD2-S5, which were MRD- by scMRD and uninformative for clonal architecture analysis. Besides *TET2* p.I762V and *TET2* p.L1721W, which are two germline SNPs included here to differentiate between donor and host cells, all other y-axis labels denote pathogenic mutations. Mutations shown in clonal bar plots correspond to all mutations detected at any VAF within the sample (Fig 3). Some mutations are missing here due to not passing the clone cutoff of  $\geq 3$  cells.

Figure S4

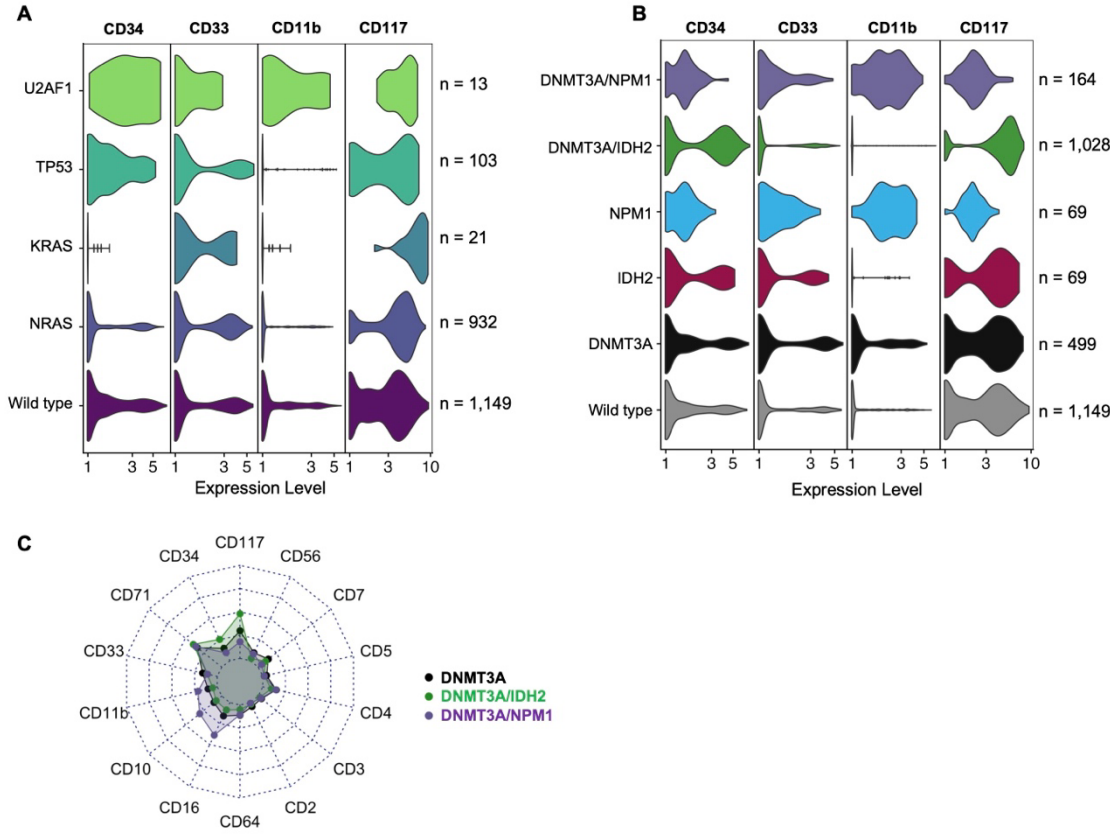

**Supplementary Figure S4.** Analysis of protein sequencing data of MRD clones. **A.** Violin plots showing CLR-normalized differential surface marker expression of various MRD clones. **B.** Violin plots showing differential surface marker expression of CH/preleukemic vs leukemic clones. **C.** Radar plot showing differential surface marker expression of CH/preleukemic (*DNMT3A*) vs leukemic (*DNMT3A/NPM1*, *DNMT3A/IDH2*) clones. Each marker is scaled relative to the maximum and minimum expression values for all cells with *DNMT3A*, *DNMT3A/NPM1*, or *DNMT3A/IDH2* mutations.

Figure S5

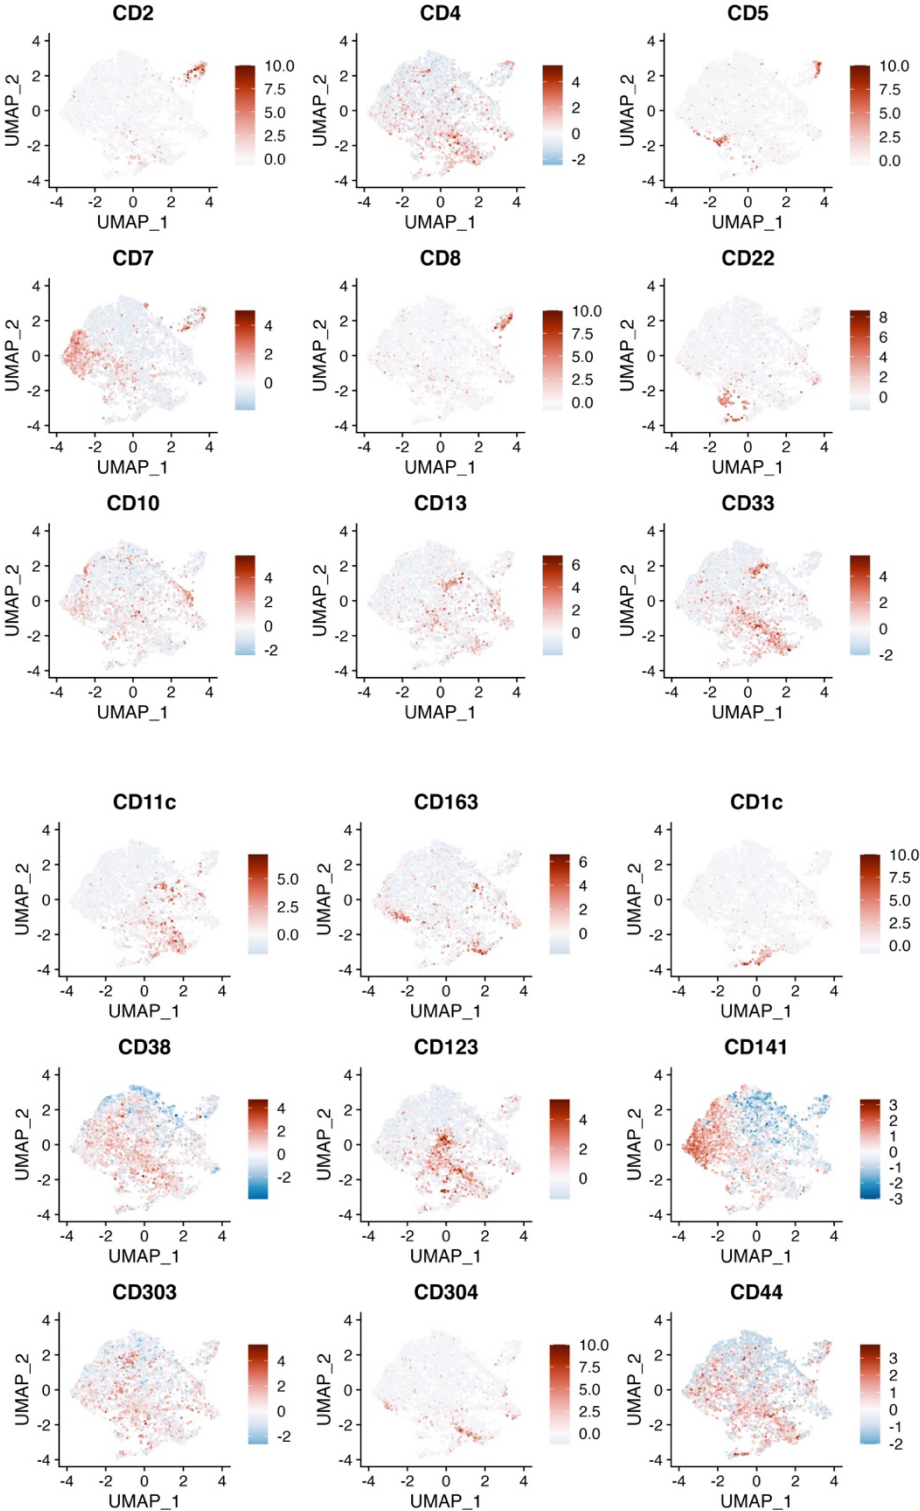

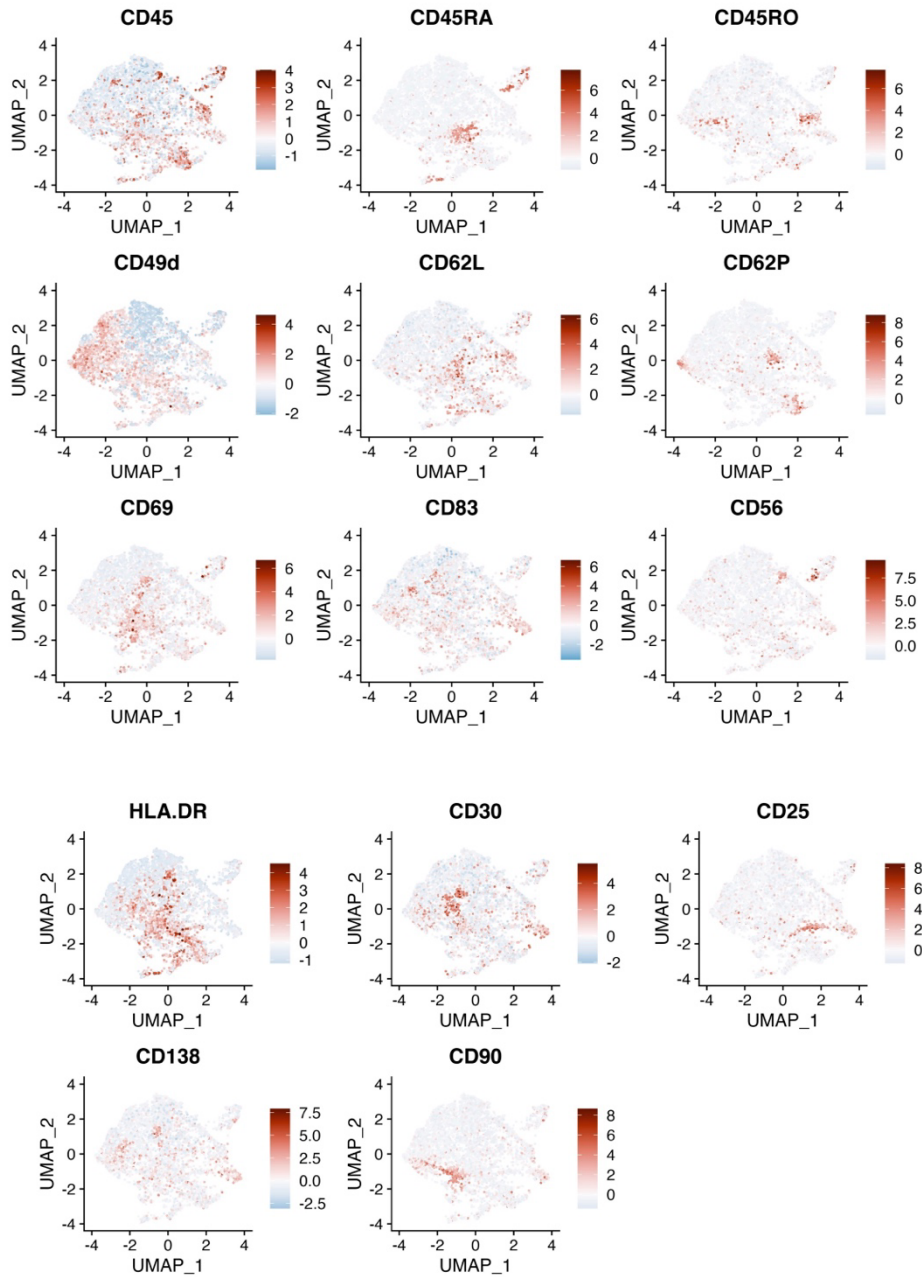

**Supplementary Figure S5.** UMAP plots showing protein expression of 32 cell surface markers across the aggregated dataset.



Figure S6

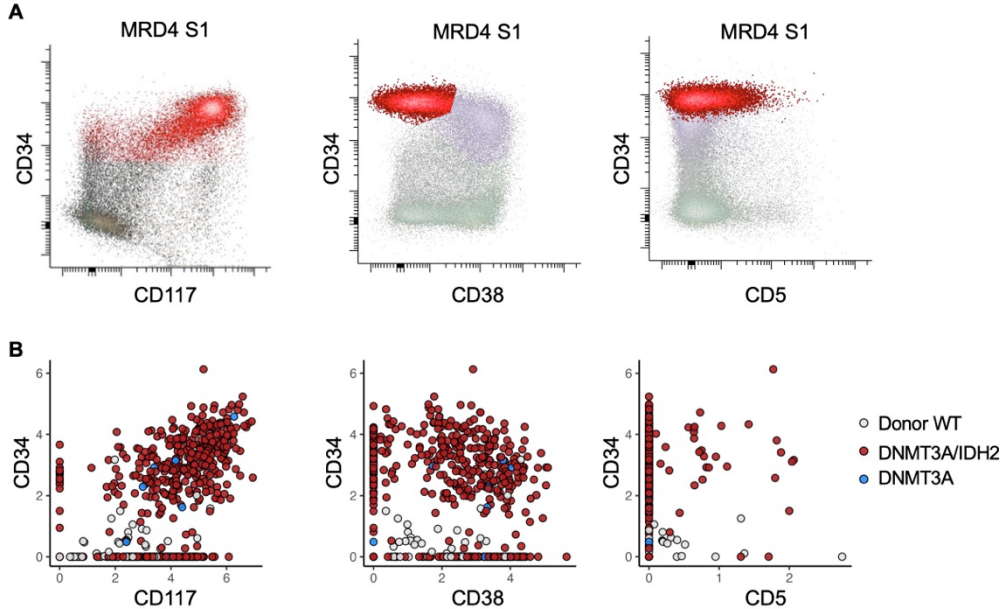

**Supplementary Figure S6.** Concordance of immunophenotype between MFC and scMRD assay from a representative patient (MRD4-S1). **A.** Flow plots showing abnormal expression of bright CD117, dim to negative CD38 and partial CD5 on CD34 positive myeloblasts. **B.** scMRD protein analysis shows similar immunophenotype to that characterized by clinical MFC.

Table S1. List of flow cytometric antibodies for cell surface staining and blocking experiments

Table S2. Characteristics of normal subjects

Table S3. Details of cell numbers in limit of detection experiments

Table S4. Spike-in of acute myeloid leukemia blasts in limit of detection experiments

Table S5. List of AML patients with MRD samples

Table S6. Parameters of multiplexed MRD samples
